# Supplementary material for: Clinical and Biological Adaptations in Obese Older Adults Following 12-Weeks of High-Intensity Interval Training or Moderate-Intensity Continuous Training
Source: MDPI journal article supplement (doi:10.3390/healthcare10071346), 2022-07-20
Supplement: s1 [file s1]

**Table 1:** Delta changes of functional capacities and skeletal muscle functions in obese older adults following 12 weeks of High-Intensity Interval Training (HIIT) and Moderate-Intensity Continuous Training (MICT).

| Parameters                      | HIIT (n=34)    | MICT (n=34)    | p-value       |
|---------------------------------|----------------|----------------|---------------|
| <i>Functional capacities</i>    |                |                |               |
| 6 min walking test (m)          | 12.35 ± 12.97  | 5.21 ± 5.35    | <b>0.005</b>  |
| Step test (n)                   | 17.02 ± 9.91   | 5.91 ± 15.00   | <b>0.0007</b> |
| 4 m walk test normal (m/s)      | 7.89 ± 10.69   | 6.44 ± 10.12   | 0.57          |
| 4 m walk test fast (m/s)        | 9.27 ± 9.89    | 8.47 ± 23.83   | <b>0.85</b>   |
| Balance test (s)                | 71.95 ± 112.49 | 51.10 ± 135.84 | 0.49          |
| Chair test (s)                  | -17.04 ± 11.70 | -4.65 ± 19.91  | <b>0.002</b>  |
| Timed Up and Go Test (s)        | -7.47 ± 15.67  | -7.69 ± 13.09  | 0.95          |
| <i>Skeletal muscle function</i> |                |                |               |
| Hand grip strength (kg)         | 12.28 ± 43.30  | 4.77 ± 19.87   | 0.38          |
| Hand grip strength/BW           | 11.78 ± 42.32  | 5.61 ± 20.88   | 0.46          |
| Hand grip strength/ALM          | 14.33 ± 42.82  | 8.24 ± 25.27   | 0.50          |
| Quadriceps strength (N)         | 4.25 ± 18.44   | 23.17 ± 21.17  | <b>0.0005</b> |
| Quad/BW                         | 4.07 ± 18.44   | 23.62 ± 22.36  | <b>0.0005</b> |
| Quad/LLM                        | 2.28 ± 18.66   | 25.25 ± 25.23  | <b>0.0001</b> |
| Lower limb power (W)            | 25.24 ± 28.05  | 20.42 ± 27.63  | 0.50          |

Data are presented as: mean ± SD. HIIT = high-intensity interval raining; MICT = moderate-intensity continuous raining; BW = body weight; ALM = arms lean mass; LLM = legs lean mass

**Table S2:** Delta changes of body composition parameters in obese older adults following 12 weeks of High-Intensity Interval Training (HIIT) and Moderate-Intensity Continuous Training (MICT)

| Parameters                                | HIIT (n=34)   | MICT (n=34)    | p-value       |
|-------------------------------------------|---------------|----------------|---------------|
| <i>Anthropometry</i>                      |               |                |               |
| Weight (kg)                               | 0.24 ± 2.48   | -0.58 ± 4.32   | 0.33          |
| BMI (kg/m <sup>2</sup> )                  | 0.17 ± 2.46   | -0.58 ± 4.32   | 0.37          |
| <i>Fat and lean mass (DXA)</i>            |               |                |               |
| Total lean mass (kg)                      | 1.58 ± 3.25   | -0.81 ± 2.69   | <b>0.002</b>  |
| Arm lean mass (kg)                        | -0.15 ± 6.99  | -2.30 ± 14.57  | 0.44          |
| Leg lean mass (kg)                        | 2.08 ± 4.22   | -0.84 ± 5.16   | <b>0.01</b>   |
| Total fat mass (%)                        | -1.05 ± 5.08  | -1.22 ± 4.50   | 0.89          |
| Arm fat mass (%)                          | -2.77 ± 7.50  | 5.05 ± 8.48    | <b>0.0001</b> |
| Leg fat mass (%)                          | -1.63 ± 6.63  | -3.65 ± 5.66   | 0.19          |
| Android fat mass (%)                      | -0.67 ± 5.44  | -1.00 ± 7.72   | 0.84          |
| Gynoid fat mass (%)                       | -1.09 ± 7.62  | -4.20 ± 7.10   | 0.09          |
| <i>Muscle composition (pQCT)</i>          |               |                |               |
| Total muscle area (cm <sup>2</sup> )      | 0.58 ± 10.41  | -13.91 ± 17.94 | <b>0.0004</b> |
| Total fat area (cm <sup>2</sup> )         | -0.12 ± 16.75 | -9.72 ± 16.44  | <b>0.03</b>   |
| Subcutaneous fat area (cm <sup>2</sup> )  | 1.15 ± 19.65  | -10.93 ± 17.11 | <b>0.01</b>   |
| Intramuscular fat area (cm <sup>2</sup> ) | 0.57 ± 62.12  | 16.41 ± 85.28  | 0.34          |

Data are presented as: mean ± SD. HIIT = high-intensity interval training; MICT = moderate-intensity continuous training; DXA = dual-energy X-ray absorptiometry; pQCT = peripheral quantitative computed tomography.

**Table S3:** Delta changes of blood parameters in obese older adults following 12 weeks of High-Intensity Interval Training (HIIT) and Moderate-Intensity Continuous Training (MICT)

| Parameters                                 | HIIT (n=34)        | MICT (n=34)       | p-value |
|--------------------------------------------|--------------------|-------------------|---------|
| <i>Blood Parameters</i>                    |                    |                   |         |
| Adiponectin ( $\mu\text{g.ml}^{-1}$ )      | -0.64 $\pm$ 32.64  | -1.96 $\pm$ 13.04 | 0.83    |
| Leptin ( $\text{ng.ml}^{-1}$ )             | 33.35 $\pm$ 114.61 | 12.71 $\pm$ 70.85 | 0.39    |
| Adiponectin/leptin                         | 0.46 $\pm$ 57.88   | 6.50 $\pm$ 39.85  | 0.63    |
| Free fatty acids ( $\text{mmol.l}^{-1}$ )  | 2.60 $\pm$ 50.84   | 22.09 $\pm$ 70.20 | 0.20    |
| Total cholesterol ( $\text{mmol.l}^{-1}$ ) | -0.74 $\pm$ 10.21  | -0.84 $\pm$ 14.07 | 0.97    |
| HDL ( $\text{mmol.l}^{-1}$ )               | 1.93 $\pm$ 9.01    | 1.98 $\pm$ 11.36  | 0.98    |
| LDL ( $\text{mmol.l}^{-1}$ )               | 1.75 $\pm$ 16.64   | -1.38 $\pm$ 20.13 | 0.49    |
| Triglycerides ( $\text{mmol}$ )            | -8.84 $\pm$ 26.77  | 1.21 $\pm$ 35.82  | 0.20    |
| Ferritin ( $\mu\text{g.l}^{-1}$ )          | -6.63 $\pm$ 43.56  | 2.48 $\pm$ 31.88  | 0.34    |
| IGF1 ( $\mu\text{g.ml}^{-1}$ )             | 6.23 $\pm$ 35.68   | 0.98 $\pm$ 19.37  | 0.47    |
| IGFBP3 ( $\mu\text{g.ml}^{-1}$ )           | 7.60 $\pm$ 28.94   | -3.05 $\pm$ 11.74 | 0.06    |
| IGF1/IGFBP3                                | -1.49 $\pm$ 16.71  | 4.35 $\pm$ 16.40  | 0.15    |
| Glucose ( $\text{mmol.l}^{-1}$ )           | 1.06 $\pm$ 7.73    | 1.95 $\pm$ 10.05  | 0.69    |
| Insulin ( $\text{pmol}$ )                  | 7.19 $\pm$ 31.54   | 2.50 $\pm$ 36.15  | 0.57    |
| QUICKI                                     | -0.38 $\pm$ 6.77   | 0.41 $\pm$ 7.08   | 0.64    |
| HOMA-IR (M.U)                              | 9.02 $\pm$ 33.84   | 5.12 $\pm$ 41.91  | 0.67    |

Data are presented as: mean  $\pm$  SD. HIIT = high-intensity interval training; MICT = moderate-intensity continuous training; HDL = high-density lipoprotein; LDL = low-density lipoprotein; IGF-1 = insulin-like growth factor-1; IGFBP-3 = insulin-like growth factor binding protein-3; QUICKI = quantitative insulin-sensitivity check index; HOMA = homeostatic model assessment for insulin resistance; M.U = mass units.

**Table S4:** Delta changes of skeletal muscle mitochondrial content in obese older adults following 12 weeks of High-Intensity Interval Training (HIIT) and Moderate-Intensity Continuous Training (MICT)

| Parameters                                   | HIIT (n=11)    | MICT (n=14)     | p-value |
|----------------------------------------------|----------------|-----------------|---------|
| <i>Skeletal muscle mitochondrial content</i> |                |                 |         |
| OPA1                                         | 38.57 ± 120.49 | 25.69 ± 70.21   | 0.75    |
| TFAM                                         | 36.25 ± 51.52  | 57.24 ± 53.88   | 0.35    |
| VDAC                                         | 22.21 ± 101.56 | 54.53 ± 109.05  | 0.47    |
| MFN1                                         | 39.33 ± 95.08  | 89.60 ± 210.04  | 0.47    |
| MFN2                                         | 71.57 ± 96.07  | 104.61 ± 354.75 | 0.77    |
| DRP1                                         | 41.78 ± 167.70 | 25.92 ± 133.93  | 0.38    |
| TOM20                                        | 54.14 ± 60.23  | 47.73 ± 111.66  | 0.87    |
| PARKIN                                       | 42.32 ± 63.07  | 24.92 ± 36.64   | 0.44    |
| OXPHOS-CI (NDUFB8)                           | 63.08 ± 136.76 | 76.31 ± 207.62  | 0.86    |
| OXPHOS-CII (SDHB)                            | 30.74 ± 38.23  | 74.67 ± 185.59  | 0.45    |
| OXPHOS-CIII (UQCRC2)                         | -5.32 ± 37.41  | 108.34 ± 208.71 | 0.09    |
| OXPHOS-CIV (MTCO1)                           | 57.38 ± 87.65  | 166.36 ± 628.06 | 0.57    |
| OXPHOS-ATPs                                  | -9.57 ± 21.64  | 119.79 ± 214.30 | 0.06    |
| OXPHOS-TOT                                   | 14.83 ± 39.87  | 21.59 ± 60.5    | 0.75    |

Data are presented as: mean ± SD. HIIT = high-intensity interval training; MICT = moderate-intensity continuous training; A.U = arbitrary unit. OPA1= optic atrophy-1; TFAM = transcription factor A mitochondrial; VDAC = voltage-dependant anion channel; MFN1 = mitofusin-1; MFN2 = mitofusin-2; DRP1 = dynamin-related protein 1; TOM20 = translocase of outer membrane 20; PARKIN = parkin RBR E3 ubiquitin protein ligase; OXPHOS-C = oxidative phosphorylation complex; NDUFB8 = NADH: ubiquinone oxidoreductase subunit B8; SDHB = succinate dehydrogenase complex iron sulfur subunit B; UQCRC2 = ubiquinol-cytochrome C reductase core protein 2; MTCO1 = mitochondrially encoded cytochrome C oxidase I; ATPs = adenosine triphosphate synthase; TOT = Total.
